# Supplementary material for: Peginterferon beta-1a in multiple sclerosis: 2-year results from ADVANCE
Source: PubMed Central journal article supplement — Mult Scler. 2015 Jul;21(8):1025–35. doi: 10.1177/1352458514557986 (PMC4512519; doi:10.1177/1352458514557986), 2015-07
Supplement: Supplementary_Appendix.pdf [file Supplementary_Appendix.pdf]

## Supplementary Appendix

**Table S1.** Baseline demographics and clinical characteristics<sup>6</sup>

| <b>Characteristic</b>                  | <b>Placebo<br/>(n=500)</b> | <b>Peginterferon<br/>beta-1a every<br/>2 weeks (n=512)</b> | <b>Peginterferon<br/>beta-1a every<br/>4 weeks (n=500)</b> |
|----------------------------------------|----------------------------|------------------------------------------------------------|------------------------------------------------------------|
| Age, years                             | 36.3 (9.7)                 | 36.9 (9.8)                                                 | 36.4 (9.9)                                                 |
| Gender, n (%) female                   | 358 (72)                   | 361 (71)                                                   | 352 (70)                                                   |
| Race, n (%) Caucasian                  | 412 (82)                   | 416 (81)                                                   | 409 (82)                                                   |
| Geographic regions, n (%)              |                            |                                                            |                                                            |
| India                                  | 56 (11)                    | 58 (11)                                                    | 56 (11)                                                    |
| North America                          | 17 (3)                     | 19 (4)                                                     | 16 (3)                                                     |
| Western Europe                         | 38 (8)                     | 41 (8)                                                     | 39 (8)                                                     |
| Eastern Europe                         | 354 (71)                   | 355 (69)                                                   | 355 (71)                                                   |
| Rest of World                          | 35 (7)                     | 39 (8)                                                     | 34 (7)                                                     |
| Time since first MS symptoms, years    | 6.3 (6.3)                  | 6.9 (6.6)                                                  | 6.5 (6.1)                                                  |
| Time since MS diagnosis, years         | 3.5 (4.6)                  | 4.0 (5.1)                                                  | 3.4 (4.4)                                                  |
| Relapses within the previous 3 years   | 2.6 (1.00)                 | 2.6 (0.99)                                                 | 2.5 (0.77)                                                 |
| Relapses within the previous 12 months | 1.6 (0.67)                 | 1.6 (0.67)                                                 | 1.5 (0.62)                                                 |
| EDSS Score                             | 2.44 (1.18)                | 2.47 (1.26)                                                | 2.48 (1.24)                                                |
| EDSS <4, n (%)                         | 432 (86)                   | 423 (83)                                                   | 413 (83)                                                   |
| EDSS ≥4, n (%)                         | 68 (14)                    | 89 (17)                                                    | 87 (17)                                                    |
| Patients absent Gd+ lesions, n (%)     | 296 (59)                   | 334 (65)                                                   | 297 (59)                                                   |
| Number of Gd+ lesions                  | 1.6 (3.8)                  | 1.2 (3.4)                                                  | 1.8 (5.4)                                                  |
| Number of new or newly-enlarging T2    | 50.6 (35.7)                | 48.7 (36.8)                                                | 51.4 (36.0)                                                |

| <b>Characteristic</b>   | <b>Placebo<br/>(n=500)</b> | <b>Peginterferon<br/>beta-1a every<br/>2 weeks (n=512)</b> | <b>Peginterferon<br/>beta-1a every<br/>4 weeks (n=500)</b> |
|-------------------------|----------------------------|------------------------------------------------------------|------------------------------------------------------------|
| lesions                 |                            |                                                            |                                                            |
| Prior medication, n (%) |                            |                                                            |                                                            |
| Glatiramer acetate      | 24 (5)                     | 27 (5)                                                     | 28 (6)                                                     |
| IFN beta-1b             | 6 (1)                      | 8 (2)                                                      | 5 (1)                                                      |
| IFN beta-1a             | 5 (1)                      | 4 (<1)                                                     | 6 (1)                                                      |

Data are presented as mean (standard deviation), unless otherwise stated.

EDSS=Expanded Disability Status Scale. Gd+=gadolinium-enhancing. IFN=interferon. MS=multiple sclerosis.

**Table S2.** Adverse events, serious adverse events, and discontinuations – Year 1 and Year 2

| Event, n (%)                                                    | Year 1 (Calabresi et al 2014) |                                                      |                                                      | Year 2                  |                                                                                            |                                                                                            |                                                      |                                                      |
|-----------------------------------------------------------------|-------------------------------|------------------------------------------------------|------------------------------------------------------|-------------------------|--------------------------------------------------------------------------------------------|--------------------------------------------------------------------------------------------|------------------------------------------------------|------------------------------------------------------|
|                                                                 | Placebo<br>(n=500)            | Peginterferon<br>beta-1a every<br>2 weeks<br>(n=512) | Peginterferon<br>beta-1a every<br>4 weeks<br>(n=500) |                         | Delayed<br>treatment:<br>peginterferon<br>beta-1a every<br>2 weeks <sup>a</sup><br>(n=228) | Delayed<br>treatment:<br>peginterferon<br>beta-1a every<br>4 weeks <sup>a</sup><br>(n=227) | Peginterferon<br>beta-1a every<br>2 weeks<br>(n=438) | Peginterferon<br>beta-1a every<br>4 weeks<br>(n=439) |
| <b>Any adverse event</b>                                        | 417 (83)                      | 481 (94)                                             | 472 (94)                                             |                         | 210 (92)                                                                                   | 206 (91)                                                                                   | 392 (89)                                             | 391 (89)                                             |
| <b>Most common adverse events (≥10% in any treatment group)</b> |                               |                                                      |                                                      |                         |                                                                                            |                                                                                            |                                                      |                                                      |
| Injection site erythema                                         | 33 (7)                        | 315 (62)                                             | 282 (56)                                             | Injection site erythema | 135 (59)                                                                                   | 119 (52)                                                                                   | 212 (48)                                             | 211 (48)                                             |
| Influenza like illness                                          | 63 (13)                       | 239 (47)                                             | 234 (47)                                             | Influenza like illness  | 106 (46)                                                                                   | 95 (42)                                                                                    | 192 (44)                                             | 199 (45)                                             |
| Pyrexia                                                         | 76 (15)                       | 228 (45)                                             | 218 (44)                                             | Pyrexia                 | 66 (29)                                                                                    | 66 (29)                                                                                    | 136 (31)                                             | 138 (31)                                             |
| Headache                                                        | 165 (33)                      | 224 (44)                                             | 204 (41)                                             | Headache                | 64 (28)                                                                                    | 70 (31)                                                                                    | 126 (29)                                             | 122 (28)                                             |
| MS relapse                                                      | 159 (32)                      | 96 (19)                                              | 111 (22)                                             | MS relapse              | 52 (23)                                                                                    | 52 (23)                                                                                    | 64 (15)                                              | 101 (23)                                             |
| Myalgia                                                         | 30 (6)                        | 97 (19)                                              | 97 (19)                                              | Myalgia                 | 27 (12)                                                                                    | 27 (12)                                                                                    | 58 (13)                                              | 60 (14)                                              |

|                                              |          |          |          |                                               |          |          |          |          |
|----------------------------------------------|----------|----------|----------|-----------------------------------------------|----------|----------|----------|----------|
| Chills                                       | 23 (5)   | 88 (17)  | 92 (18)  | Chills                                        | 29 (13)  | 28 (12)  | 41 (9)   | 52 (12)  |
| Injection site<br>pain                       | 15 (3)   | 77 (15)  | 67 (13)  | Nasopharyngitis                               | 17 (7)   | 22 (10)  | 47 (11)  | 45 (10)  |
| Asthenia                                     | 38 (8)   | 68 (13)  | 70 (14)  | Injection site<br>pain                        | 25 (11)  | 25 (11)  | 45 (10)  | 32 (7)   |
| Back pain                                    | 57 (11)  | 61 (12)  | 64 (13)  | Injection site<br>pruritus                    | 26 (11)  | 17 (7)   | 47 (11)  | 24 (5)   |
| Injection site<br>pruritus                   | 6 (1)    | 68 (13)  | 56 (11)  | Asthenia                                      | 10 (4)   | 24 (11)  | 40 (9)   | 39 (9)   |
| Nasopharyngitis                              | 77 (15)  | 53 (10)  | 69 (14)  | Arthralgia                                    | 14 (6)   | 23 (10)  | 33 (8)   | 33 (8)   |
| Arthralgia                                   | 35 (7)   | 57 (11)  | 54 (11)  | --                                            |          | --       |          |          |
| Fatigue                                      | 49 (10)  | 51 (10)  | 55 (11)  | --                                            |          | --       |          |          |
| Pain in<br>extremity                         | 49 (10)  | 44 (9)   | 54 (11)  | --                                            |          | --       |          |          |
| <b>Severe adverse<br/>events<sup>b</sup></b> | 53 (11)  | 90 (18)  | 82 (16)  | <b>Severe adverse<br/>events<sup>b</sup></b>  | 39 (17)  | 34 (15)  | 56 (13)  | 62 (14)  |
| <b>AEs related to<br/>study treatment</b>    | 266 (53) | 459 (90) | 449 (90) | <b>AEs related to<br/>study<br/>treatment</b> | 198 (87) | 179 (79) | 350 (80) | 357 (81) |

|                                       |                     |                     |                     |                                       |         |                     |                     |         |
|---------------------------------------|---------------------|---------------------|---------------------|---------------------------------------|---------|---------------------|---------------------|---------|
| <b>AEs leading to discontinuation</b> | 7 (1)               | 25 (5)              | 24 (5)              | <b>AEs leading to discontinuation</b> | 8 (4)   | 9 (4)               | 8 (2)               | 9 (2)   |
| <b>Any serious adverse events</b>     | 76 (15)             | 55 (11)             | 71 (14)             | <b>Any serious adverse events</b>     | 36 (16) | 42 (19)             | 39 (9)              | 67 (15) |
| <b>Deaths</b>                         | 2 (<1) <sup>c</sup> | 1 (<1) <sup>d</sup> | 1 (<1) <sup>e</sup> | <b>Deaths</b>                         | 0 (0)   | 2 (<1) <sup>f</sup> | 3 (<1) <sup>g</sup> | 0 (0)   |

<sup>a</sup>Delayed treatment groups: patients who received placebo in Year 1 and switched to peginterferon beta-1a in Year 2.

<sup>b</sup>Severe adverse events were defined as symptom(s) that cause severe discomfort; incapacitation or significant impact on subject's daily life; severity may cause cessation of treatment with study treatment; treatment for symptom(s) could be given and/or subject hospitalized.

<sup>c</sup>n=1 sudden death of unknown cause, n=1 subarachnoid hemorrhage.

<sup>d</sup>n=1 cause unknown.

<sup>e</sup>n=1 septicemic shock.

<sup>f</sup>n=1 squamous cell carcinoma oral cavity, n=1 aspiration pneumonia

<sup>g</sup>n=1 sudden death, cause unknown, n=1 car accident, n=1 pneumonia/septicaemia

**Table S3:** Potentially clinically significant hematology lab abnormalities – Year 2

| <b>Parameters/criterion</b>                           | <b>Delayed treatment: peginterferon beta-1a every 2 weeks<sup>a</sup> (n=228<sup>b</sup>)</b> | <b>Delayed treatment: peginterferon beta-1a every 4 weeks<sup>a</sup> (n=227<sup>b</sup>)</b> | <b>Peginterferon beta-1a every 2 weeks (n=438<sup>b</sup>)</b> | <b>Peginterferon beta-1a every 4 weeks (n=439<sup>b</sup>)</b> |
|-------------------------------------------------------|-----------------------------------------------------------------------------------------------|-----------------------------------------------------------------------------------------------|----------------------------------------------------------------|----------------------------------------------------------------|
| <b>Patients with any post-baseline value, total n</b> | 227                                                                                           | 227                                                                                           | 438                                                            | 438                                                            |
| <b>WBC, n (%)</b>                                     |                                                                                               |                                                                                               |                                                                |                                                                |
| <3 x 10 <sup>9</sup> /L                               | 23 (10)                                                                                       | 7 (3)                                                                                         | 42 (10)                                                        | 22 (5)                                                         |
| <b>Lymphocytes, n (%)</b>                             |                                                                                               |                                                                                               |                                                                |                                                                |
| <0.8 x 10 <sup>9</sup> /L                             | 13 (6)                                                                                        | 7 (3)                                                                                         | 35 (8)                                                         | 23 (5)                                                         |
| <b>PMN, n (%)</b>                                     |                                                                                               |                                                                                               |                                                                |                                                                |
| ≤1.0 x 10 <sup>9</sup> /L                             | 2 (<1)                                                                                        | 0 (0)                                                                                         | 4 (<1)                                                         | 6 (1)                                                          |
| <b>Hemoglobin, n (%)</b>                              |                                                                                               |                                                                                               |                                                                |                                                                |
| ≤100 g/L                                              | 15 (7)                                                                                        | 9 (4)                                                                                         | 19 (4)                                                         | 20 (5)                                                         |
| <b>Platelet count, n (%)</b>                          |                                                                                               |                                                                                               |                                                                |                                                                |
| ≤100 x 10 <sup>9</sup> /L                             | 3 (1)                                                                                         | 2 (<1)                                                                                        | 5 (1)                                                          | 4 (<1)                                                         |

PMN=polymorphonuclear leukocytes. WBC=white blood cell.

<sup>a</sup>Delayed treatment groups: patients who received placebo in Year 1 and switched to peginterferon beta-1a in Year 2.

<sup>b</sup>Total n is the number of patients in the safety population dosed in year 2 with at least one post-baseline value. This is the denominator for percentages in parentheses.

**Table S4:** Maximum post-baseline liver transaminases – Year 2

| <b>Parameters/Criterion</b>                           | <b>Delayed treatment: peginterferon beta-1a every 2 weeks<sup>a</sup> (n=228<sup>b</sup>)</b> | <b>Delayed treatment: peginterferon beta-1a every 4 weeks<sup>a</sup> (n=227<sup>b</sup>)</b> | <b>Peginterferon beta-1a every 2 weeks (n=438<sup>b</sup>)</b> | <b>Peginterferon beta-1a every 4 weeks (n=439<sup>b</sup>)</b> |
|-------------------------------------------------------|-----------------------------------------------------------------------------------------------|-----------------------------------------------------------------------------------------------|----------------------------------------------------------------|----------------------------------------------------------------|
| <b>Patients with any post-baseline value, total n</b> | 227                                                                                           | 227                                                                                           | 438                                                            | 438                                                            |
| <b>ALT, n (%)</b>                                     |                                                                                               |                                                                                               |                                                                |                                                                |
| >1 x ULN                                              | 111 (49)                                                                                      | 70 (31)                                                                                       | 162 (37)                                                       | 124 (28)                                                       |
| ≥3x ULN                                               | 9 (4)                                                                                         | 8 (4)                                                                                         | 14 (3)                                                         | 15 (3)                                                         |
| >5 x ULN                                              | 2 (<1)                                                                                        | 2 (<1)                                                                                        | 7 (2)                                                          | 7 (2)                                                          |
| <b>AST, n (%)</b>                                     |                                                                                               |                                                                                               |                                                                |                                                                |
| >1 x ULN                                              | 72 (32)                                                                                       | 36 (16)                                                                                       | 119 (27)                                                       | 73 (17)                                                        |
| ≥3x ULN                                               | 4 (2)                                                                                         | 1 (<1)                                                                                        | 9 (2)                                                          | 10 (2)                                                         |
| >5 x ULN                                              | 2 (<1)                                                                                        | 0 (0)                                                                                         | 6 (1)                                                          | 5 (1)                                                          |

ALT=alanine transaminase. AST=aspartate transaminase. ULN=upper limit of normal.

<sup>a</sup>Delayed treatment groups: patients who received placebo in Year 1 and switched to peginterferon beta-1a in Year 2.

<sup>b</sup>Total n is the number of patients in the safety population dosed in year 2 with at least one post-baseline value. This is the denominator for percentages in parentheses. Baseline is Year 1 baseline for patients previously treated with peginterferon beta-1a, and year 2 baseline for patients previously treated with placebo, during year 1.

**Table S5.** Potentially clinically significant hematology lab abnormalities over 2 years – All patients who received peginterferon beta-1a any time over 2 years

| <b>Parameters/criterion</b>  | <b>Peginterferon beta-1a<br/>every 2 weeks<br/>(n=740)</b> | <b>Peginterferon beta-1a<br/>every 4 weeks<br/>(n=728)</b> |
|------------------------------|------------------------------------------------------------|------------------------------------------------------------|
| <b>WBC, n (%)</b>            |                                                            |                                                            |
| <3 x 10 <sup>9</sup> /L      | 80 (11)                                                    | 43 (6)                                                     |
| <b>Lymphocytes, n (%)</b>    |                                                            |                                                            |
| <0.8 x 10 <sup>9</sup> /L    | 64 (9)                                                     | 48 (7)                                                     |
| <b>PMN, n (%)</b>            |                                                            |                                                            |
| ≤1.0 x 10 <sup>9</sup> /L    | 11 (1)                                                     | 11 (2)                                                     |
| <b>Hemoglobin, n (%)</b>     |                                                            |                                                            |
| ≤100 g/L                     | 42 (6)                                                     | 35 (5)                                                     |
| <b>Platelet count, n (%)</b> |                                                            |                                                            |
| ≤100 x 10 <sup>9</sup> /L    | 13 (2)                                                     | 7 (<1)                                                     |

PMN=polymorphonuclear leukocytes. WBC=white blood cell.



**Table S6.** Maximum post-baseline liver transaminases over 2 years – All patients who received peginterferon beta-1a any time over 2 years

| <b>Parameters/Criterion</b> | <b>Peginterferon beta-1a<br/>every 2 weeks<br/>(n=740)</b> | <b>Peginterferon beta-1a<br/>every 4 weeks<br/>(n=728)</b> |
|-----------------------------|------------------------------------------------------------|------------------------------------------------------------|
| <b>ALT, n (%)</b>           |                                                            |                                                            |
| >1 x ULN                    | 399 (54)                                                   | 292 (40)                                                   |
| ≥3x ULN                     | 56 (8)                                                     | 38 (5)                                                     |
| >5 x ULN                    | 21 (3)                                                     | 17 (2)                                                     |
| <b>AST, n (%)</b>           |                                                            |                                                            |
| >1 x ULN                    | 293 (40)                                                   | 171 (24)                                                   |
| ≥3x ULN                     | 23 (3)                                                     | 21 (3)                                                     |
| >5 x ULN                    | 11 (1)                                                     | 8 (1)                                                      |

ALT=alanine transaminase. AST=aspartate transaminase. ULN=upper limit of normal.

**Table S7:** Incidence of positive antibody tests over 2 years – All patients who received peginterferon beta-1a any time over 2 years

| <b>Antibody type</b>                                                            | <b>Peginterferon beta-1a<br/>every 2 weeks<br/>(n=740)</b> | <b>Peginterferon beta-1a<br/>every 4 weeks<br/>(n=728)</b> | <b>Total<br/>(n=1468)</b> |
|---------------------------------------------------------------------------------|------------------------------------------------------------|------------------------------------------------------------|---------------------------|
| <b>Number of antibody positive/number at risk (%)– Post-baseline to Week 96</b> |                                                            |                                                            |                           |
| IFN binding (BAbs)<br>positive                                                  | 54/706 (8)                                                 | 36/706 (5)                                                 | 90/1412 (6)               |
| IFN neutralizing (NAbs)<br>positive                                             | 7/715 (<1)                                                 | 6/716 (<1)                                                 | 13/1431 (<1)              |
| Anti-PEG positive                                                               | 40/681 (6)                                                 | 55/682 (8)                                                 | 95/1363 (7)               |

IFN=interferon. PEG=polyethylene glycol.

Entries are number of antibody positive/number at risk. Number at risk is the number of patients whose baseline antibody was not positive and who had at least one post-baseline antibody value for any time post baseline. Numbers in parentheses are percentages based on number at risk.
